# Supplementary material for: Circularly polarized activity from two photon excitable europium and samarium chiral bioprobes
Source: Royal Society of Chemistry journal article supplement (doi:10.1039/d2tc05362d), 2023-01-01
Supplement: d2tc05362d1.pdf [file d2tc05362d1.pdf]

## Supporting information

### **Circularly Polarized activity from two photon excitable Europium and Samarium chiral bioprobes**

Silvia Mizzoni,<sup>[1,2]</sup> Silvia Ruggieri,<sup>[1]</sup> Annika Sickinger,<sup>[2]</sup> François Riobé,<sup>[2]</sup> Laure Guy,<sup>[2]</sup> Margaux Roux,<sup>[2]</sup> Guillaume Micouin,<sup>[2]</sup> Akos Banyasz,<sup>[2]</sup> Olivier Maury,<sup>\*[2]</sup> Bruno Baguenard,<sup>[3]</sup> Amina Bensalah-Ledoux,<sup>[3]</sup> Stéphan Guy,<sup>[3]</sup> Alexei Grichine,<sup>[4]</sup> Xuan-Nhi Nguyen,<sup>[5]</sup> Andrea Cimorelli,<sup>[5]</sup> Martina Sanadar,<sup>[6]</sup> Andrea Melchior<sup>\*[6]</sup> and Fabio Piccinelli<sup>\*[1]</sup>

<sup>1</sup> Luminescent Materials Laboratory, DB, Università di Verona, and INSTM, UdR Verona, Strada Le Grazie 15, 37134 Verona, Italy.

<sup>2</sup> Univ Lyon, ENS de Lyon, CNRS UMR 5182, Laboratoire de Chimie, Lyon F-69342, France.

<sup>3</sup> Univ. Lyon, Institut Lumière Matière, UMR 5306 CNRS–Université Claude Bernard, Lyon 1, 10 rue Ada Byron, F-69622 Villeurbanne Cedex, France.

<sup>4</sup> Institute for Advanced Biosciences, University Grenoble Alpes, Inserm U1209, CNRS, UMR 5309, Site Santé, Allée des Alpes, 38700, La Tronche, France.

<sup>5</sup> Centre International de Recherche en Infectiologie (CIRI), Univ Lyon, Inserm, U1111, Université Claude Bernard Lyon 1, CNRS, UMR5308, ENS de Lyon, Lyon-France

<sup>6</sup> Dipartimento Politecnico di Ingegneria e Architettura, Laboratorio di Tecnologie Chimiche, Università di Udine, via Cotonificio 108, 33100 Udine, Italy

## TABLE OF CONTENTS

|     |                                          |    |
|-----|------------------------------------------|----|
| S1. | LIGANDS CHARACTERIZATION                 | 3  |
| S2. | COMPLEXES CHARACTERIZATION               | 8  |
| S3. | PHOTOPHYSICAL COMPLEXES CHARACTERIZATION | 16 |
| S4. | CHIROPTIC MEASUREMENTS                   | 22 |
| S5. | REFERENCES                               | 26 |

## S1. LIGANDS CHARACTERIZATION

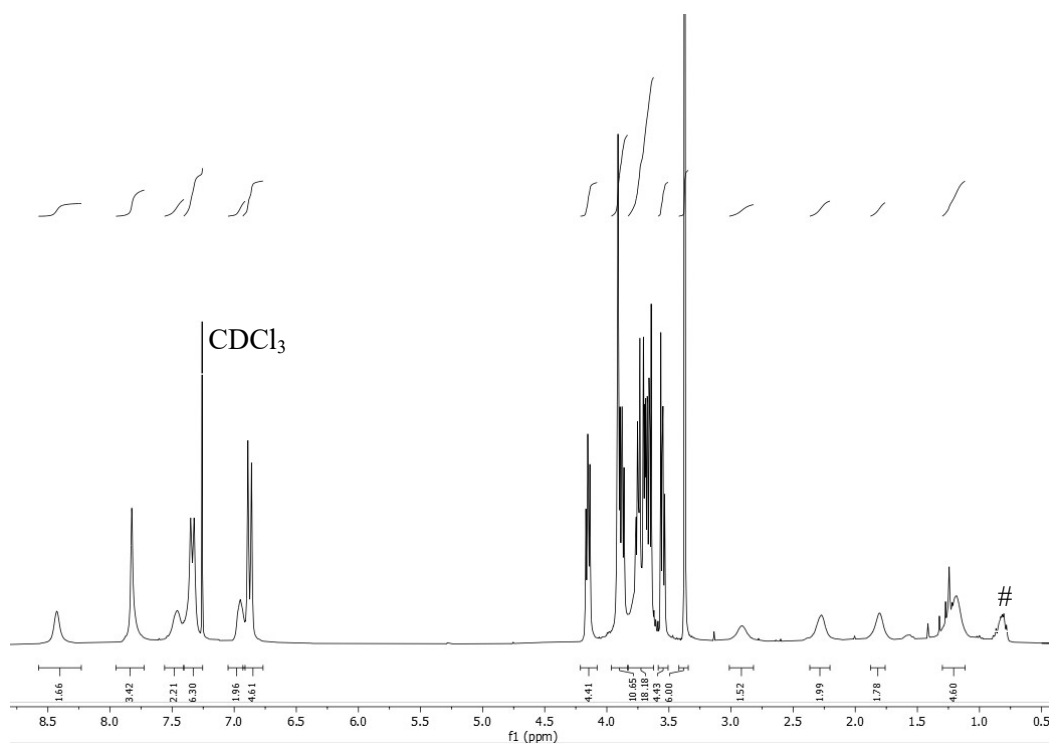

**Figure S1:** <sup>1</sup>H-NMR spectrum (400 MHz, CDCl<sub>3</sub>, 25 °C) of ligand (S,S)-3. # is related to “grease”<sup>1</sup>

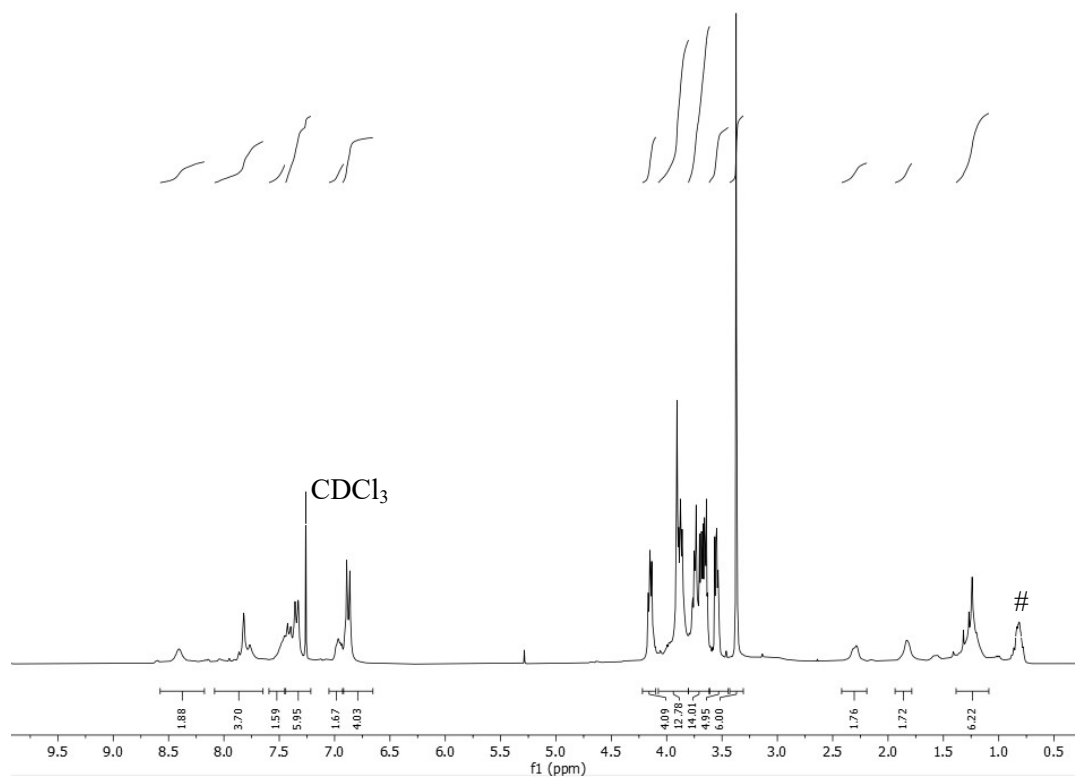

**Figure S2:** <sup>1</sup>H-NMR spectrum (400 MHz, CDCl<sub>3</sub>, 25 °C) of ligand (R,R)-3. # is related to “grease”<sup>1</sup>

## Display Report

|                      |                                                  |                  |           |                       |  |
|----------------------|--------------------------------------------------|------------------|-----------|-----------------------|--|
| <b>Analysis Info</b> |                                                  | Acquisition Date |           | 6/14/2022 11:21:08 AM |  |
| Analysis Name        | D:\Data\Data\2022\2022_06\Impact2_220614_04_L1.d | Operator         | Demo User |                       |  |
| Method               | Tune_pos_Standard.m                              | Instrument       | Impact II | 1825265.10081         |  |
| Sample Name          |                                                  | Comment          |           |                       |  |

|                              |          |                      |          |                  |           |
|------------------------------|----------|----------------------|----------|------------------|-----------|
| <b>Acquisition Parameter</b> |          |                      |          |                  |           |
| Source Type                  | ESI      | Ion Polarity         | Positive | Set Nebulizer    | 0.3 Bar   |
| Focus                        | Active   | Set Capillary        | 1500 V   | Set Dry Heater   | 200 °C    |
| Scan Begin                   | 50 m/z   | Set End Plate Offset | -500 V   | Set Dry Gas      | 4.0 l/min |
| Scan End                     | 1000 m/z | Set Charging Voltage | 2000 V   | Set Divert Valve | Source    |
|                              |          | Set Corona           | 0 nA     | Set APCI Heater  | 0 °C      |

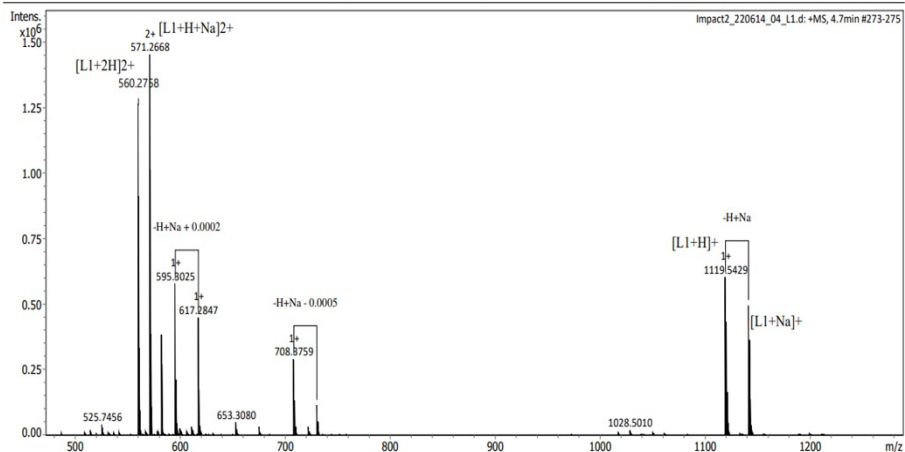

Impact2\_220614\_04\_L1.d  
 Bruker Compass DataAnalysis 5.2  
 printed: 6/14/2022 1:56:16 PM  
 by: demo  
 Page 1 of 1

# #

### CENTRE COMMUN DE SPECTROMETRIE DE MASSE

|                      |                        |                   |           |                       |  |
|----------------------|------------------------|-------------------|-----------|-----------------------|--|
| <b>Analysis Info</b> |                        | Acquisition Date  |           | 6/14/2022 11:21:08 AM |  |
| Analysis Name        | Impact2_220614_04_L1.d | Instrument / Ser# | Impact II | 1825265.1             |  |
| Method               | Tune_pos_Standard.m    | Comment           |           |                       |  |
| Comment              |                        | 9081              |           |                       |  |

|                              |          |                       |           |                  |           |
|------------------------------|----------|-----------------------|-----------|------------------|-----------|
| <b>Acquisition Parameter</b> |          |                       |           |                  |           |
| Source Type                  | ESI      | Ion Polarity          | Positive  | Set Nebulizer    | 0.3 Bar   |
| Focus                        | Active   | Set Capillary         | 1500 V    | Set Dry Heater   | 200 °C    |
| Scan Begin                   | 50 m/z   | Set End Plate Offset  | -500 V    | Set Dry Gas      | 4.0 l/min |
| Scan End                     | 1000 m/z | Set Collision Cell RF | 750.0 Vpp | Set Divert Valve | Source    |

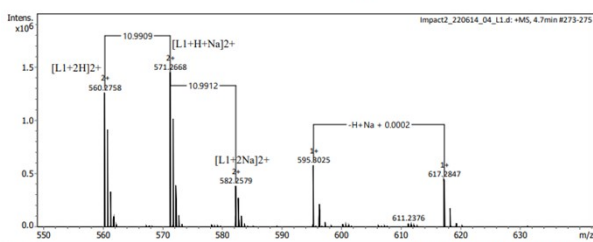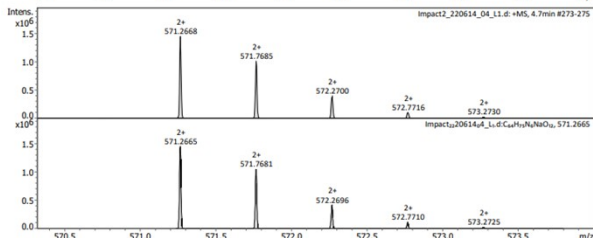

| Meas. m/z | Ion Formula    | m/z      | Sum Formula    | err [ppm] | mSigma | Adduct | z  |
|-----------|----------------|----------|----------------|-----------|--------|--------|----|
| 560.2758  | C64H76N6O12    | 560.2755 | C64H76N6O12    | -0.6      | 10.1   | M      | 2+ |
| 571.2668  | C64H75N6NaO12  | 571.2665 | C64H75N6NaO12  | -0.5      | 15.7   | M      | 2+ |
| 582.2579  | C64H74N6Na2O12 | 582.2575 | C64H74N6Na2O12 | -0.8      | 10.8   | M      | 2+ |

Bruker Compass DataAnalysis 5.2

Page 1 of 1

### CENTRE COMMUN DE SPECTROMETRIE DE MASSE

|                      |                        |                   |           |                       |  |
|----------------------|------------------------|-------------------|-----------|-----------------------|--|
| <b>Analysis Info</b> |                        | Acquisition Date  |           | 6/14/2022 11:21:08 AM |  |
| Analysis Name        | Impact2_220614_04_L1.d | Instrument / Ser# | Impact II | 1825265.1             |  |
| Method               | Tune_pos_Standard.m    | Comment           |           |                       |  |
| Comment              |                        | 9081              |           |                       |  |

|                              |          |                       |           |                  |           |
|------------------------------|----------|-----------------------|-----------|------------------|-----------|
| <b>Acquisition Parameter</b> |          |                       |           |                  |           |
| Source Type                  | ESI      | Ion Polarity          | Positive  | Set Nebulizer    | 0.3 Bar   |
| Focus                        | Active   | Set Capillary         | 1500 V    | Set Dry Heater   | 200 °C    |
| Scan Begin                   | 50 m/z   | Set End Plate Offset  | -500 V    | Set Dry Gas      | 4.0 l/min |
| Scan End                     | 1000 m/z | Set Collision Cell RF | 750.0 Vpp | Set Divert Valve | Source    |

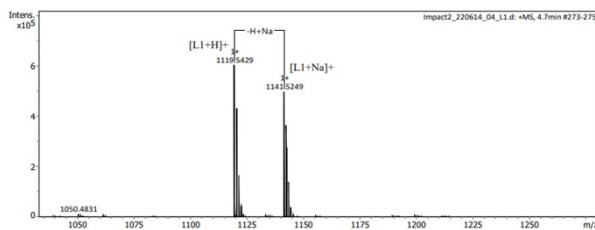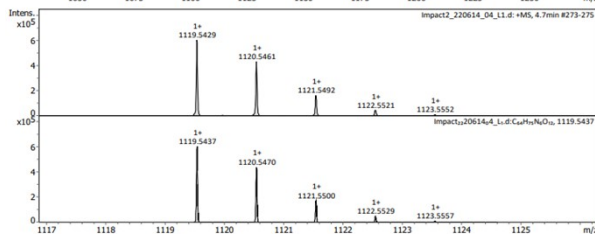

| Meas. m/z | Ion Formula   | m/z       | Sum Formula   | err [ppm] | mSigma | Adduct | z  |
|-----------|---------------|-----------|---------------|-----------|--------|--------|----|
| 1119.5429 | C64H75N6O12   | 1119.5437 | C64H74N6O12   | 0.7       | 7.6    | M+H    | 1+ |
| 1141.5249 | C64H74N6NaO12 | 1141.5257 | C64H74N6NaO12 | 0.7       | 3.5    | M+Na   | 1+ |

Bruker Compass DataAnalysis 5.2

Page 1 of 1

Figure S3. HR-MS spectrum of (S,S)-3.

Display Report

Analysis Info  
 Analysis Name: D:\Data\Data\2022\2022\_06\Impact2\_220614\_05\_L2.d  
 Method: Tune\_pos\_Standard.m  
 Sample Name: Impact II  
 Comment: 1825265.10081

Acquisition Date: 6/14/2022 11:27:52 AM  
 Operator: Demo User  
 Instrument: impact II

Acquisition Parameter  
 Source Type: ESI  
 Focus: Active  
 Scan Begin: 50 m/z  
 Scan End: 2000 m/z  
 Ion Polarity: Positive  
 Set Capillary: 1500 V  
 Set End Plate Offset: -500 V  
 Set Charging Voltage: 2000 V  
 Set Corona: 0 nA  
 Set Nebulizer: 0.3 Bar  
 Set Dry Heater: 200 °C  
 Set Dry Gas: 4.0 l/min  
 Set Divert Valve: Source  
 Set APCI Heater: 0 °C

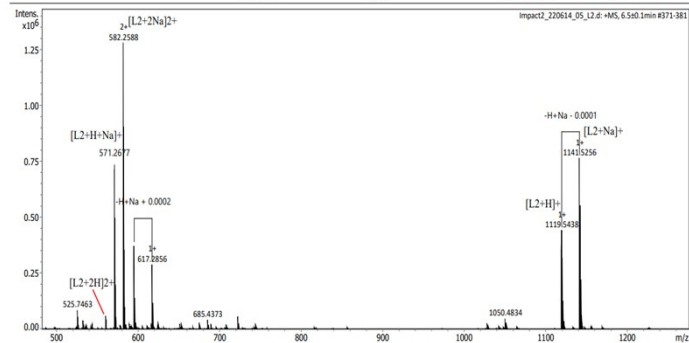

Impact2\_220614\_05\_L2.d  
 Bruker Compass DataAnalysis 5.2  
 printed: 6/14/2022 2:05:40 PM  
 by: demo  
 Page 1 of 1

CENTRE COMMUN DE SPECTROMETRIE DE MASSE

Analysis Info  
 Analysis Name: Impact2\_220614\_05\_L2.d  
 Method: Tune\_pos\_Standard.m  
 Acquisition Date: 6/14/2022 11:27:52 AM  
 Instrument / Ser#: impact II / 1825265.1  
 Comment: 0981

Acquisition Parameter  
 Source Type: ESI  
 Focus: Active  
 Scan Begin: 50 m/z  
 Scan End: 2000 m/z  
 Ion Polarity: Positive  
 Set Capillary: 1500 V  
 Set End Plate Offset: -500 V  
 Set Collision Cell RF: 1500.0 Vpp  
 Set Nebulizer: 0.3 Bar  
 Set Dry Heater: 200 °C  
 Set Dry Gas: 4.0 l/min  
 Set Divert Valve: Source

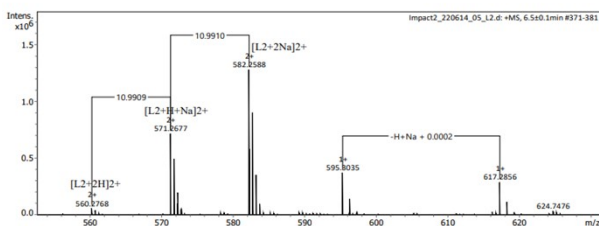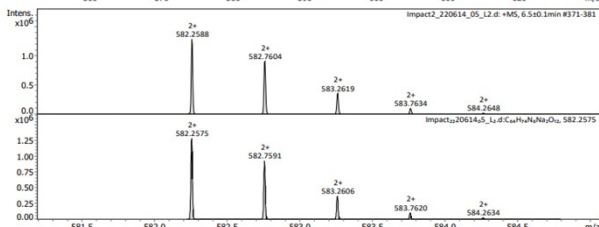

| Meas. m/z | Ion Formula    | m/z      | Sum Formula    | err [ppm] | mSigma | Adduct | z  |
|-----------|----------------|----------|----------------|-----------|--------|--------|----|
| 560.2768  | C64H76N6O12    | 560.2755 | C64H76N6O12    | -2.3      | 9.5    | M      | 2+ |
| 571.2677  | C64H75N6NaO12  | 571.2665 | C64H75N6NaO12  | -2.2      | 15.1   | M      | 2+ |
| 582.2588  | C64H74N6Na2O12 | 582.2575 | C64H74N6Na2O12 | -2.2      | 10.6   | M      | 2+ |

Bruker Compass DataAnalysis 5.2

Page 1 of 1

CENTRE COMMUN DE SPECTROMETRIE DE MASSE

Analysis Info  
 Analysis Name: Impact2\_220614\_05\_L2.d  
 Method: Tune\_pos\_Standard.m  
 Acquisition Date: 6/14/2022 11:27:52 AM  
 Instrument / Ser#: impact II / 1825265.1  
 Comment: 0981

Acquisition Parameter  
 Source Type: ESI  
 Focus: Active  
 Scan Begin: 50 m/z  
 Scan End: 2000 m/z  
 Ion Polarity: Positive  
 Set Capillary: 1500 V  
 Set End Plate Offset: -500 V  
 Set Collision Cell RF: 1500.0 Vpp  
 Set Nebulizer: 0.3 Bar  
 Set Dry Heater: 200 °C  
 Set Dry Gas: 4.0 l/min  
 Set Divert Valve: Source

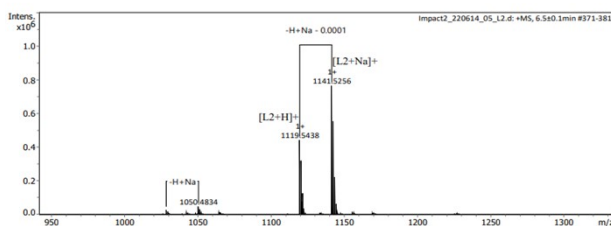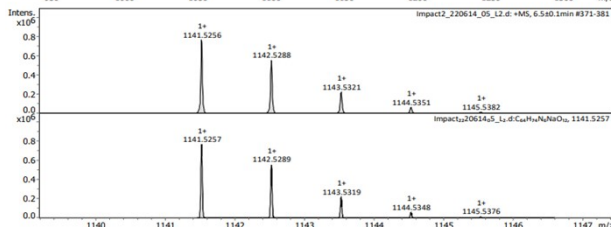

| Meas. m/z | Ion Formula   | m/z       | Sum Formula   | err [ppm] | mSigma | Adduct | z  |
|-----------|---------------|-----------|---------------|-----------|--------|--------|----|
| 1119.5438 | C64H75N6O12   | 1119.5437 | C64H74N6O12   | -0.0      | 2.8    | M+H    | 1+ |
| 1141.5256 | C64H74N6NaO12 | 1141.5257 | C64H74N6NaO12 | 0.0       | 2.5    | M+Na   | 1+ |

Bruker Compass DataAnalysis 5.2

Page 1 of 1

Figure S4. HR-MS spectrum of (R,R)-3.

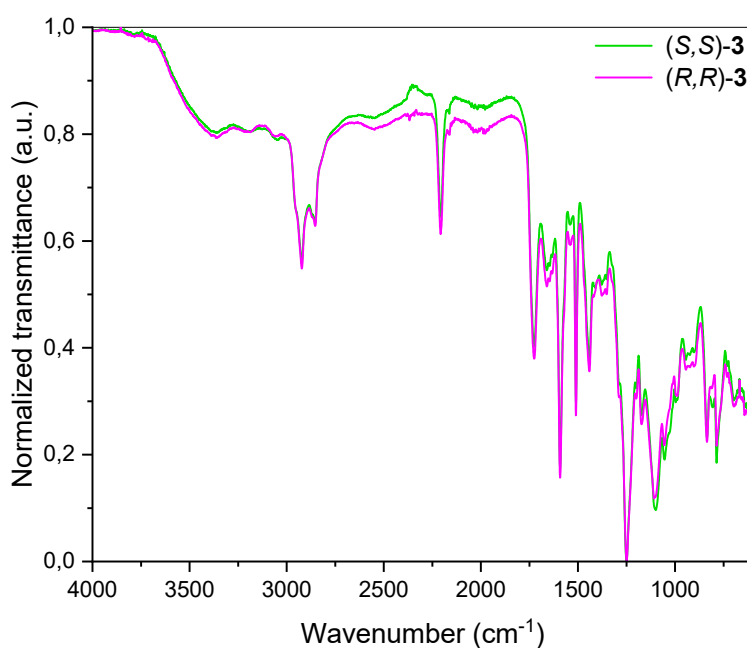

**Figure S5.** FT-IR spectra of both the enantiomer of (S,S) and the (R,R) enantiomer of **3**.

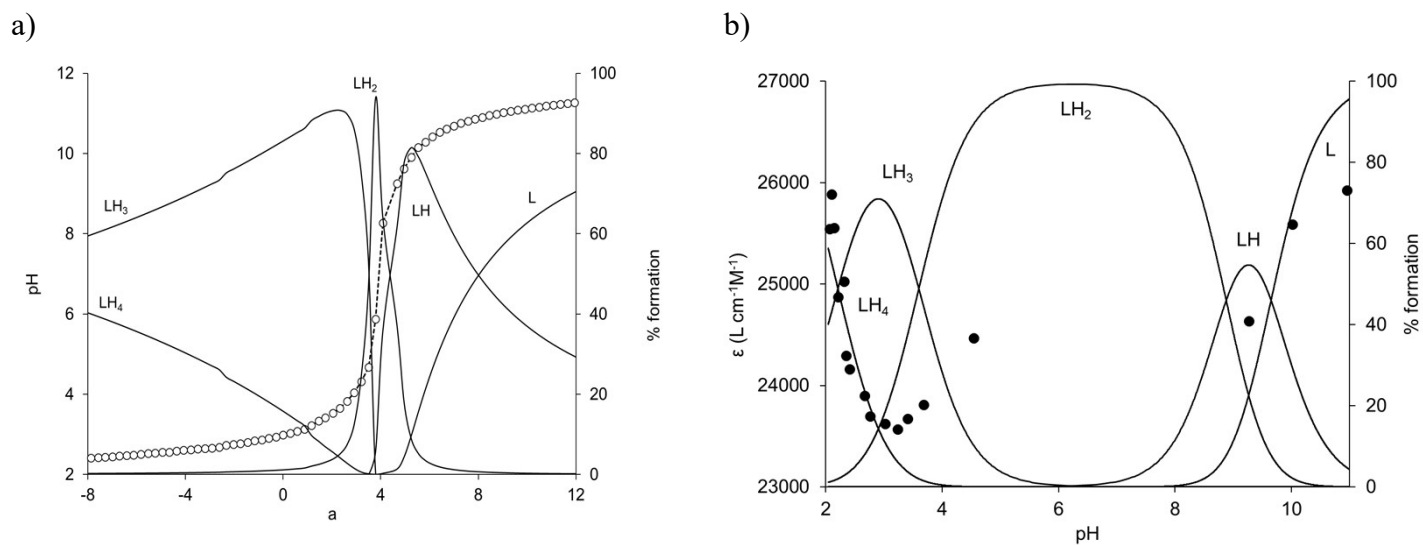

**Figure S6.** a) Experimental (○) and calculated (dashed line) pH values in the potentiometric titration of the ligand L (25 °C,  $\mu = 0.1$  M NaCl); total ligand 0.43 mM).  $a = (\text{added mol OH}^-) / (\text{mol/L})$ . b) Species distribution of the ligand L with molar absorptance values at  $\lambda = 320$  nm ( $\epsilon$ ) obtained by acid–base spectrophotometric titration (25 °C,  $\mu = 0.1$  M NaCl). The speciation was calculated using the reported protonation constants (Table 1). Charges omitted for clarity.

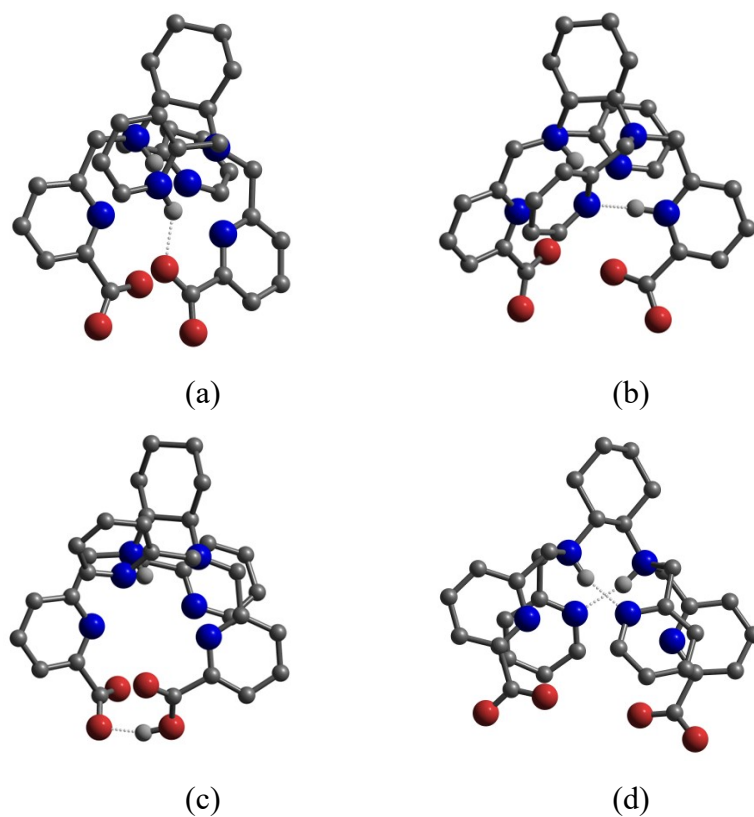

**Figure S7.** Minimum energy structures of the LH<sub>2</sub> protonated species of the analogue of L (L'') where the antennas were reduced to decrease the number of degrees of freedom. In these structures, one proton is attached to one aliphatic amine group and the second occupies different protonation sites. The calculations were carried out at DFT/ $\omega$ B97X-D/6-31+G(d) level. Hydrogen atoms attached to carbons have been hidden for clarity.

## S2. COMPLEXES CHARACTERIZATION

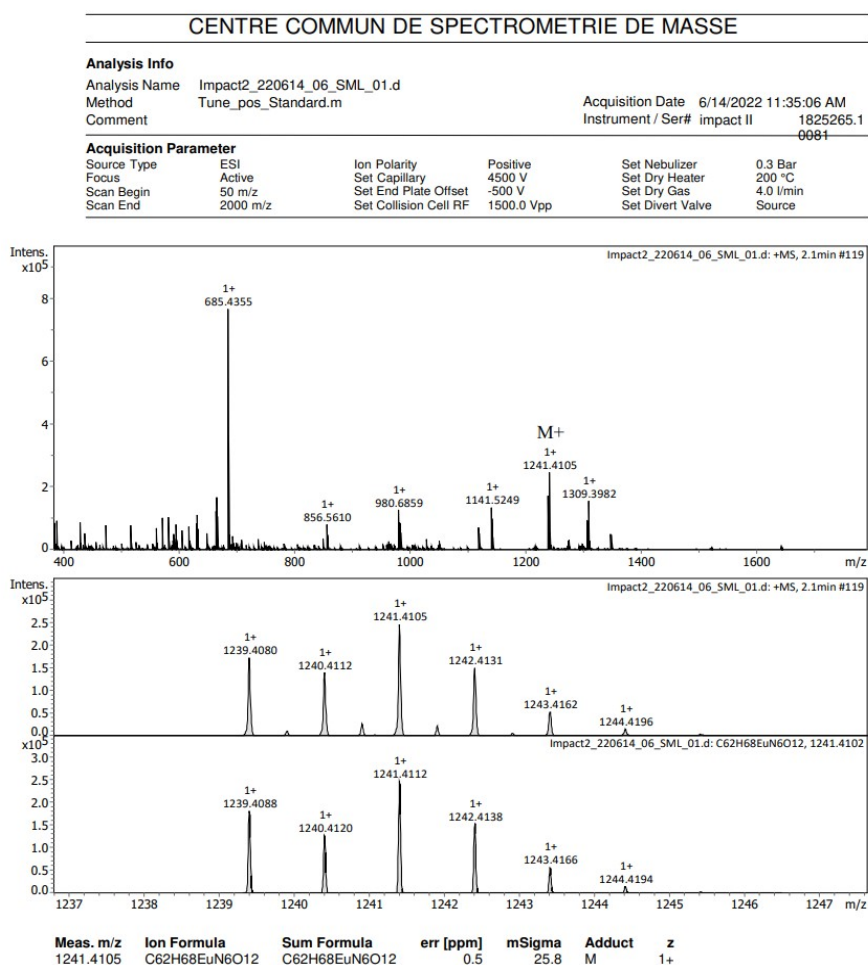

**Figure S8.** HR-MS spectrum of (*S,S*)-[EuL]Cl.



CENTRE COMMUN DE SPECTROMETRIE DE MASSE

**Analysis Info**

Analysis Name Impact2\_220614\_07\_SML\_04.d  
 Method Tune\_pos\_Standard.m  
 Comment  
 Acquisition Date 6/14/2022 11:38:52 AM  
 Instrument / Ser# impact II 1825265.1  
 0681

**Acquisition Parameter**

|             |          |                       |            |                  |           |
|-------------|----------|-----------------------|------------|------------------|-----------|
| Source Type | ESI      | Ion Polarity          | Positive   | Set Nebulizer    | 0.3 Bar   |
| Focus       | Active   | Set Capillary         | 4500 V     | Set Dry Heater   | 200 °C    |
| Scan Begin  | 50 m/z   | Set End Plate Offset  | -500 V     | Set Dry Gas      | 4.0 l/min |
| Scan End    | 2000 m/z | Set Collision Cell RF | 1500.0 Vpp | Set Divert Valve | Source    |

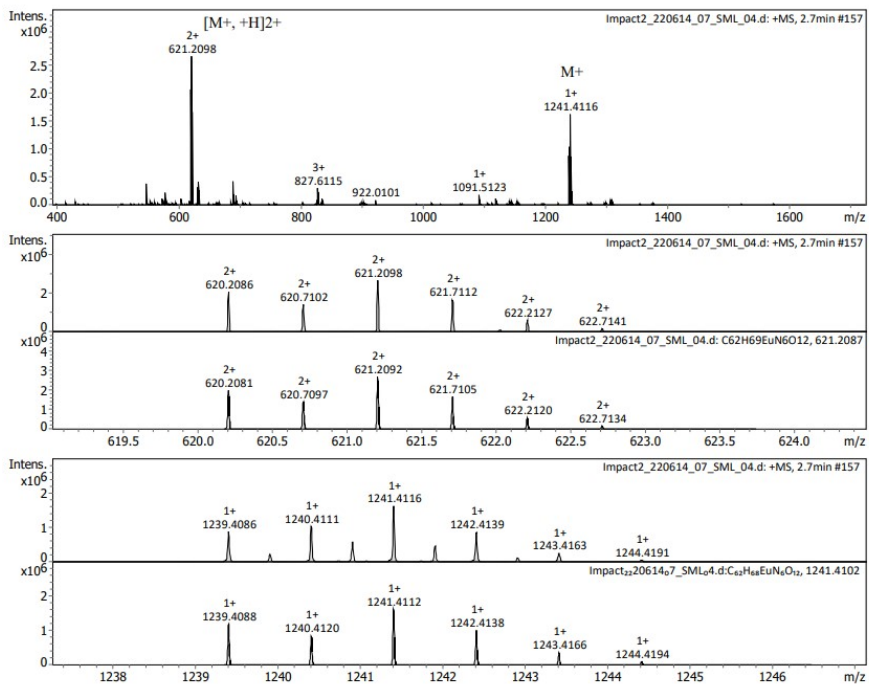

| Meas. m/z | Ion Formula   | Sum Formula   | err [ppm] | mSigma | Adduct | z  |
|-----------|---------------|---------------|-----------|--------|--------|----|
| 621.2098  | C62H69EuN6O12 | C62H69EuN6O12 | -0.9      | 18.4   | M      | 2+ |
| 1241.4116 | C62H68EuN6O12 | C62H68EuN6O12 | -0.4      | 103.6  | M      | 1+ |

**Figure S9.** HR-MS spectrum of *(R,R)*-[EuL]Cl.

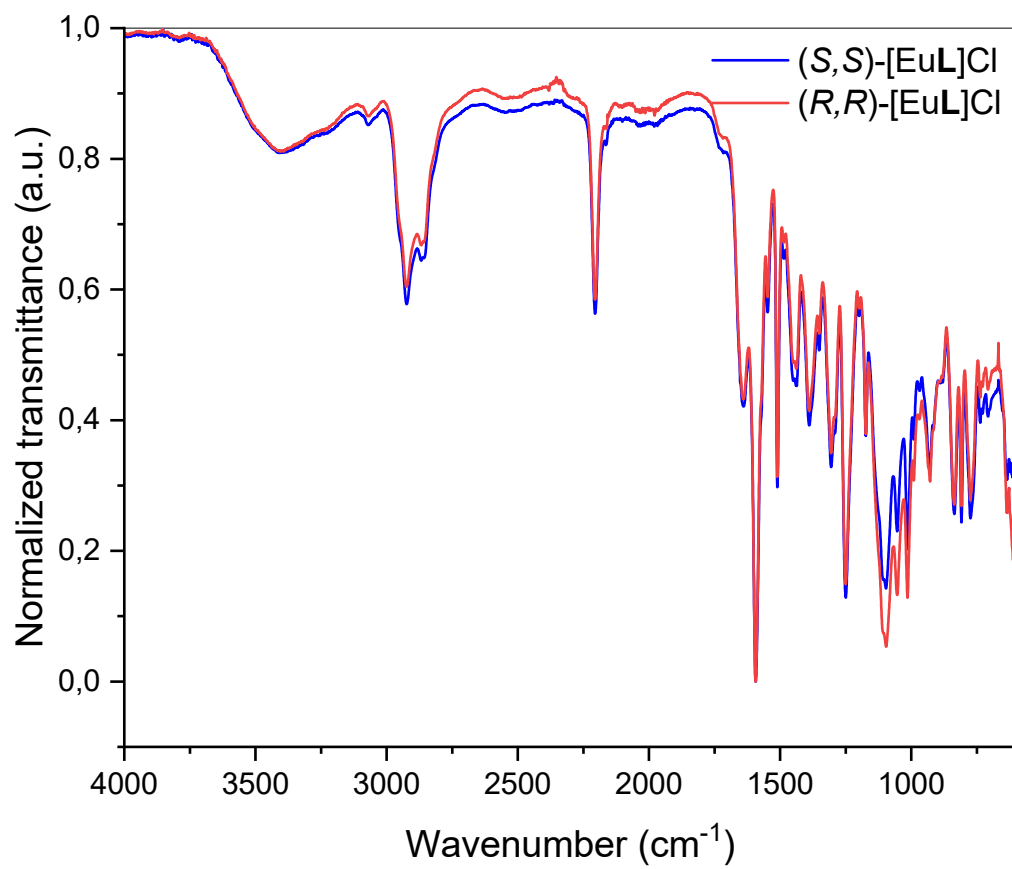

**Figure S10.** FT-IR spectra of both the enantiomer of [EuL]Cl complex.

CENTRE COMMUN DE SPECTROMETRIE DE MASSE

**Analysis Info**

|               |                              |                   |                     |
|---------------|------------------------------|-------------------|---------------------|
| Analysis Name | Impact2_220907_04_SML_05-2.d | Acquisition Date  | 9/7/2022 2:40:15 PM |
| Method        | Tune_pos_Standard.m          | Instrument / Ser# | impact II 1825265.1 |
| Comment       |                              |                   | 0081                |

**Acquisition Parameter**

|             |          |                       |            |                  |           |
|-------------|----------|-----------------------|------------|------------------|-----------|
| Source Type | ESI      | Ion Polarity          | Positive   | Set Nebulizer    | 0.3 Bar   |
| Focus       | Active   | Set Capillary         | 4500 V     | Set Dry Heater   | 200 °C    |
| Scan Begin  | 50 m/z   | Set End Plate Offset  | -500 V     | Set Dry Gas      | 4.0 l/min |
| Scan End    | 2500 m/z | Set Collision Cell RF | 1500.0 Vpp | Set Divert Valve | Source    |

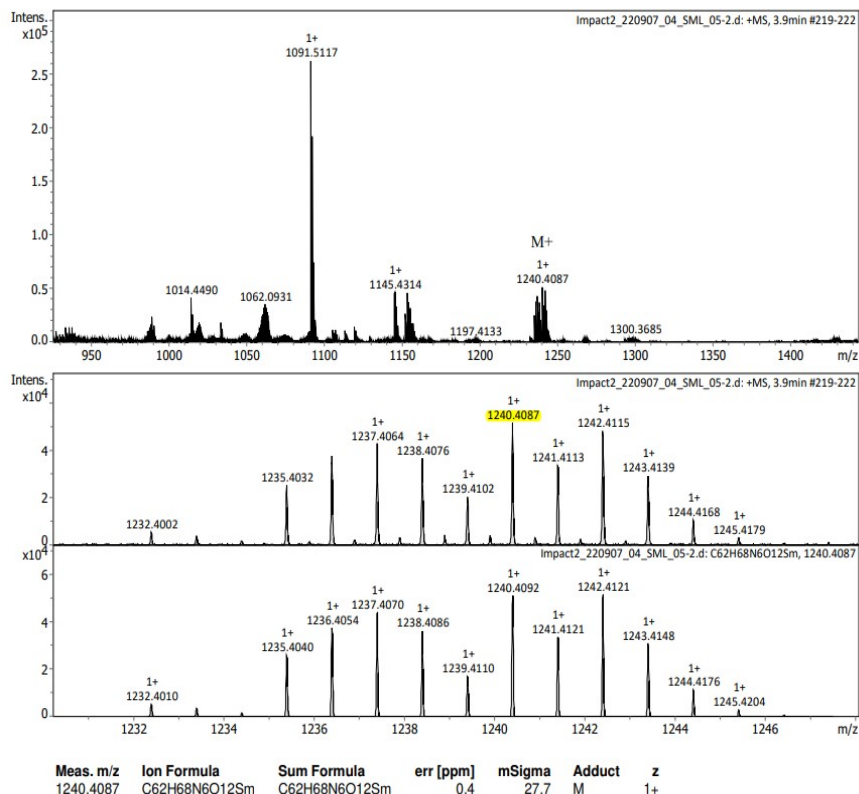

**Figure S11.** HR-MS spectrum of (*S,S*)-[SmL]Cl.

CENTRE COMMUN DE SPECTROMETRIE DE MASSE

**Analysis Info**

Analysis Name Impact2\_220907\_06\_SML\_10.d Acquisition Date 9/7/2022 3:08:44 PM  
 Method Tune\_pos\_Standard.m Instrument / Ser# impact II 1825265.1  
 Comment 0081

**Acquisition Parameter**

|             |          |                       |            |                  |           |
|-------------|----------|-----------------------|------------|------------------|-----------|
| Source Type | ESI      | Ion Polarity          | Positive   | Set Nebulizer    | 0.3 Bar   |
| Focus       | Active   | Set Capillary         | 4500 V     | Set Dry Heater   | 200 °C    |
| Scan Begin  | 50 m/z   | Set End Plate Offset  | -500 V     | Set Dry Gas      | 4.0 l/min |
| Scan End    | 2500 m/z | Set Collision Cell RF | 1500.0 Vpp | Set Divert Valve | Source    |

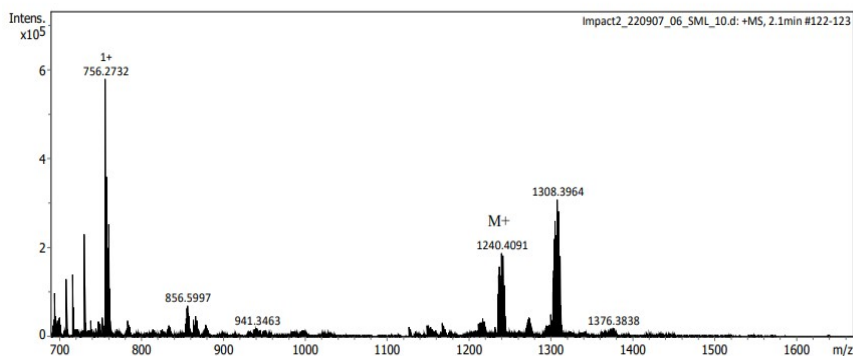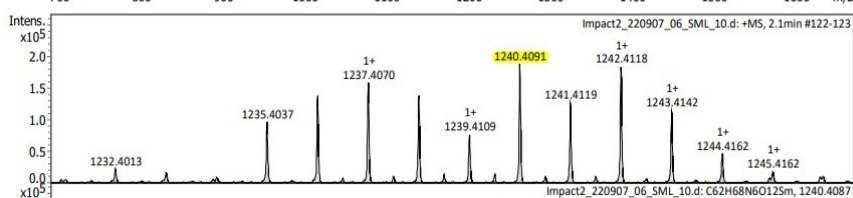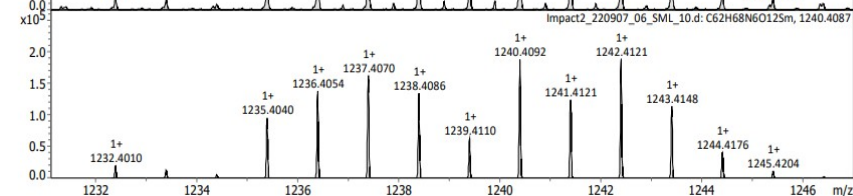

| Meas. m/z | Ion Formula   | Sum Formula   | err [ppm] | mSigma | Adduct | z  |
|-----------|---------------|---------------|-----------|--------|--------|----|
| 1240.4091 | C62H68N6O12Sm | C62H68N6O12Sm | 0.1       | 29.5   | M      | 1+ |

**Figure S12.** HR-MS spectrum of (*R,R*)-[SmL]Cl.

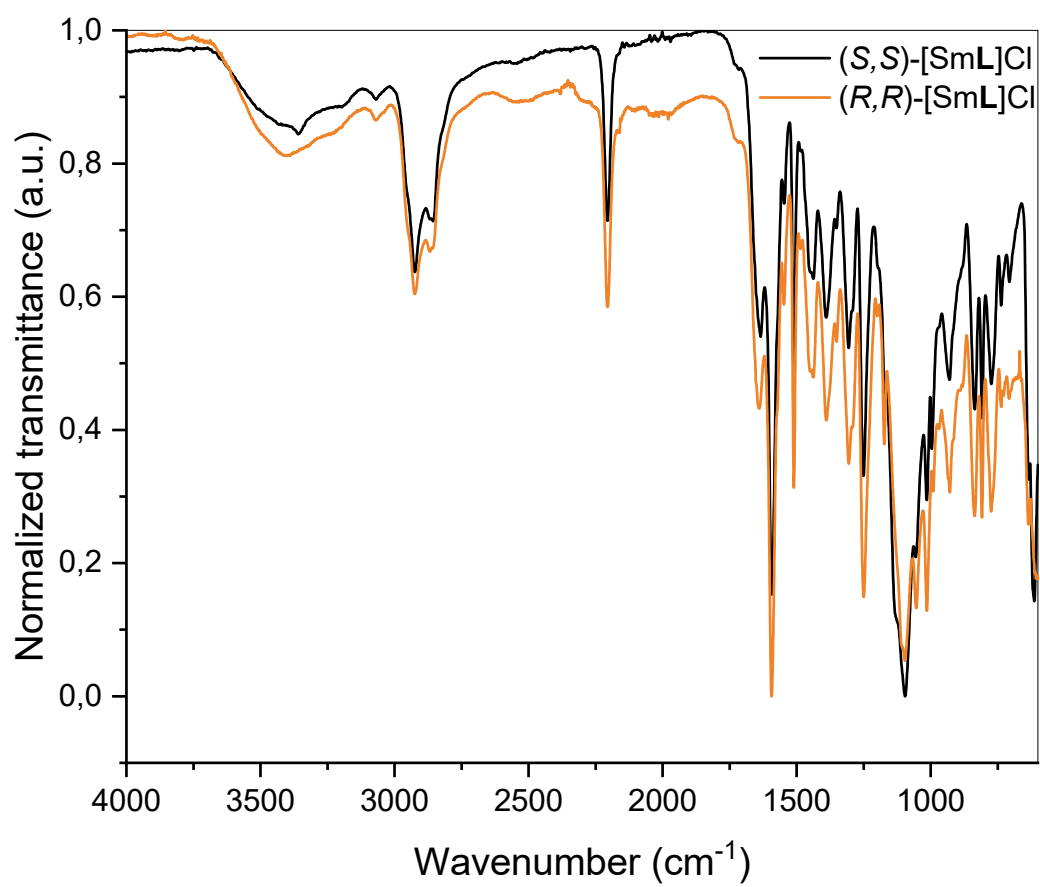

**Figure S13.** FT-IR spectra of both the enantiomer of [SmL]Cl complex.

CENTRE COMMUN DE SPECTROMETRIE DE MASSE

**Analysis Info**

Analysis Name Impact2\_220907\_05\_SML\_06.d  
 Method Tune\_pos\_Standard.m  
 Comment  
 Acquisition Date 9/7/2022 2:53:18 PM  
 Instrument / Ser# impact II 1825265.1  
 0081

**Acquisition Parameter**

Source Type ESI Ion Polarity Positive Set Nebulizer 0.3 Bar  
 Focus Active Set Capillary 2500 V Set Dry Heater 200 °C  
 Scan Begin 50 m/z Set End Plate Offset -500 V Set Dry Gas 4.0 l/min  
 Scan End 2500 m/z Set Collision Cell RF 1500.0 Vpp Set Divert Valve Source

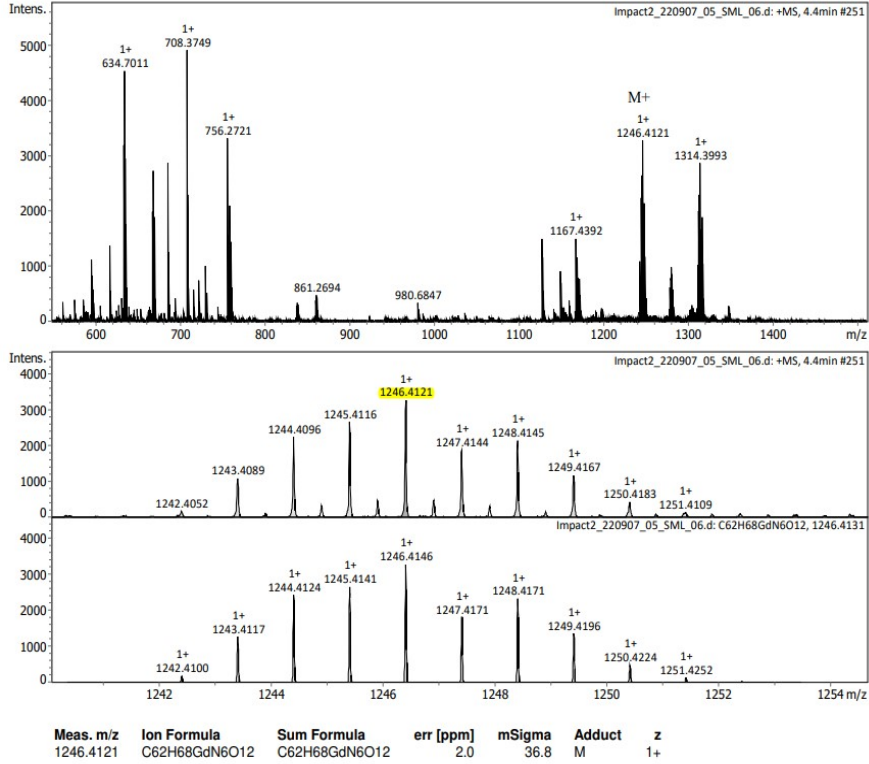

**Figure S14.** HR-MS spectrum of (*S,S*)-[GdL]Cl.

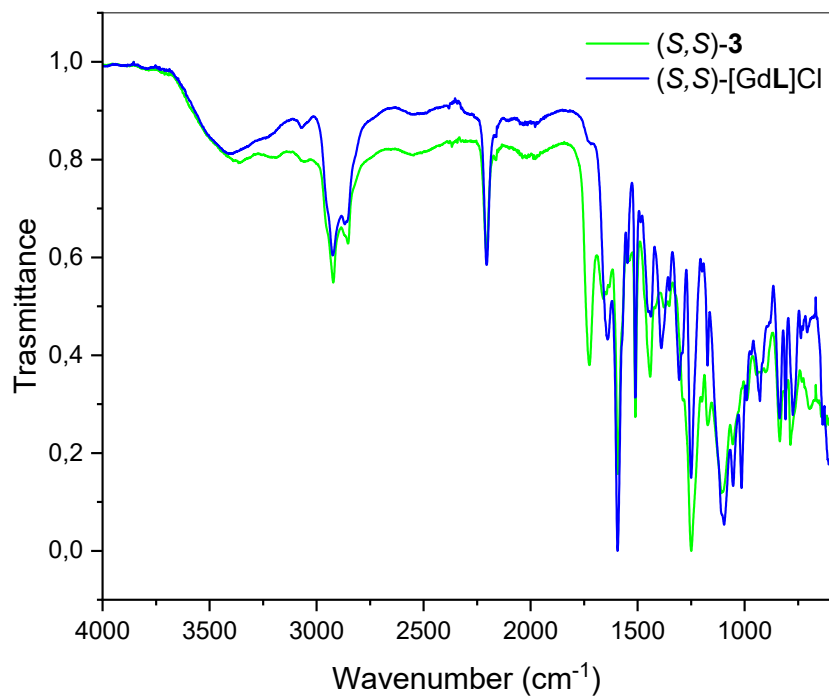

**Figure S15.** FT-IR spectra of (S,S) enantiomer of **3** and its related [GdL]Cl complex.

### S3. PHOTOPHYSICAL COMPLEXES CHARACTERIZATION

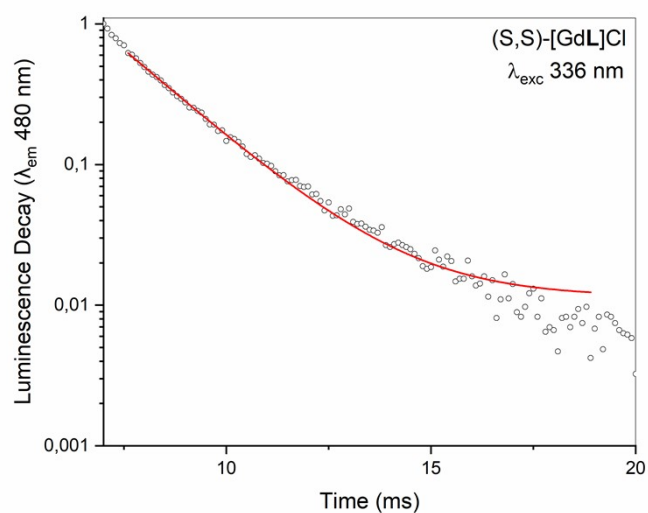

**Figure S16.** Luminescence (phosphorescence) decay of the triplet state of the ligand **L** in (S,S)-[GdL]Cl embedded in ethanol:methanol 4:1 matrix at 77 K.  $\lambda_{\text{exc}} = 336$  nm,  $\lambda_{\text{em}} = 485$  nm.  $\tau = 1.62$  ms.

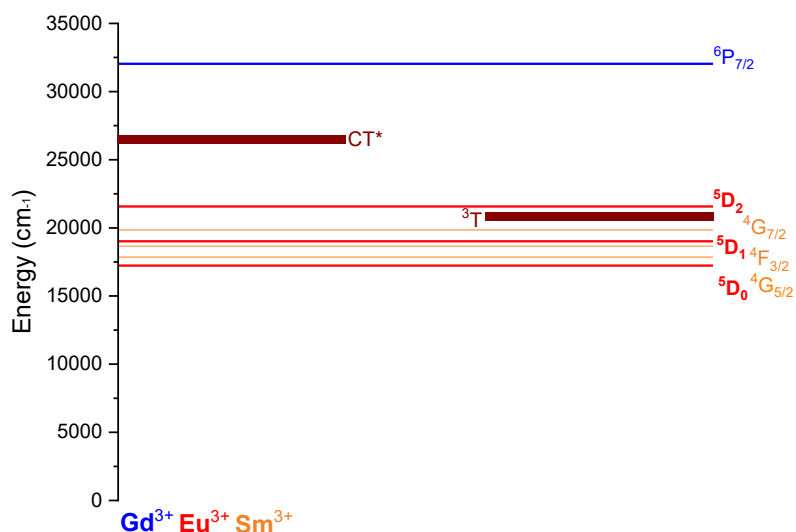

**Figure S17.** Energy level position of the lower excited states of Eu(III) (red lines/labels), Sm(III) (orange/labels), Gd(III) (blue line/label) and of the ligand (charge transfer and triplet levels at 26100  $\text{cm}^{-1}$  and 20833  $\text{cm}^{-1}$ , respectively).<sup>2</sup>



**Table S1. Photophysical data of europium and samarium complexes in methanol at room temperature.**

|                                          | (S,S)-[EuL]Cl                 | (S,S)-[EuL]Cl                 | (S,S)-[SmL]Cl               | (R,R)-[SmL]Cl               |
|------------------------------------------|-------------------------------|-------------------------------|-----------------------------|-----------------------------|
| $\epsilon$                               | 47581 (337 nm)                | 47 546 (337 nm)               | 47461 (337 nm)              | 47462 (337 nm)              |
| (L·mol <sup>-1</sup> ·cm <sup>-1</sup> ) | 36273 (254 nm)                | 37801 (254 nm)                | 36195 (254 nm)              | 34525 (254 nm)              |
| $\tau$<br>(ms)                           | 890 (1520 CH <sub>3</sub> OD) | 860 (1500 CH <sub>3</sub> OD) | 23 (124 CH <sub>3</sub> OD) | 23 (123 CH <sub>3</sub> OD) |
| m                                        | 0.97 <sup>a</sup>             | 1.03 <sup>a</sup>             | 1 <sup>b</sup>              | 1 <sup>b</sup>              |
| $\phi^c$                                 | 0.21                          | 0.24                          | 0.021                       | 0.025                       |
| $\sigma^d$<br>(GM)                       | 112                           | 86                            | –                           | –                           |
| $g_{Abs}$                                | 1.55 (259 nm)                 | -1.41 (259 nm)                | 1.69 (259 nm)               | -1.46 (259 nm)              |
|                                          | 1.67 (286 nm)                 | -1.42(286 nm)                 | 2.50 (284 nm)               | -1.61 (284 nm)              |
| $g_{lum}^e$                              | -0.125 (594 nm)               | +0.129 (594 nm)               | +0.204 (564 nm)             | -0.184 (564 nm)             |
|                                          | +0.128 (596 nm)               | -0.134 (596 nm)               | -0.098 (598 nm)             | +0.091 (598 nm)             |
|                                          | +0.065 (615 nm)               | -0.066 (615 nm)               |                             |                             |
| $B^{337\text{ nm}}$                      | 9992                          | 11411                         | 997                         | 1186                        |
| (L·mol <sup>-1</sup> ·cm <sup>-1</sup> ) |                               |                               |                             |                             |

<sup>a</sup>  $m = 2,1 (\tau_{CH3OH}^{-1} - \tau_{CD3OD}^{-1}) \cdot 3$  <sup>b</sup>  $q_{\text{methanol}}$  factor = 0.028<sup>c</sup> Using quinine sulfate in H<sub>2</sub>SO<sub>4</sub> 1N as standard ( $\Phi = 54.6\%$ ,  $\lambda_{\text{ex}} = 340$  nm). <sup>d</sup> Determined in methanol. <sup>e</sup>  $g_{lum}$  values are referred to the most intense component of the <sup>5</sup>D<sub>0</sub>→<sup>7</sup>F<sub>1</sub> (593 nm) and <sup>5</sup>D<sub>0</sub>→<sup>7</sup>F<sub>2</sub> (615 nm) transitions for Eu<sup>3+</sup> and <sup>4</sup>G<sub>5/2</sub>→<sup>6</sup>H<sub>5/2</sub> (564 nm) <sup>4</sup>G<sub>5/2</sub>→<sup>6</sup>H<sub>7/2</sub> (598 nm) transitions for Sm<sup>3+</sup>.

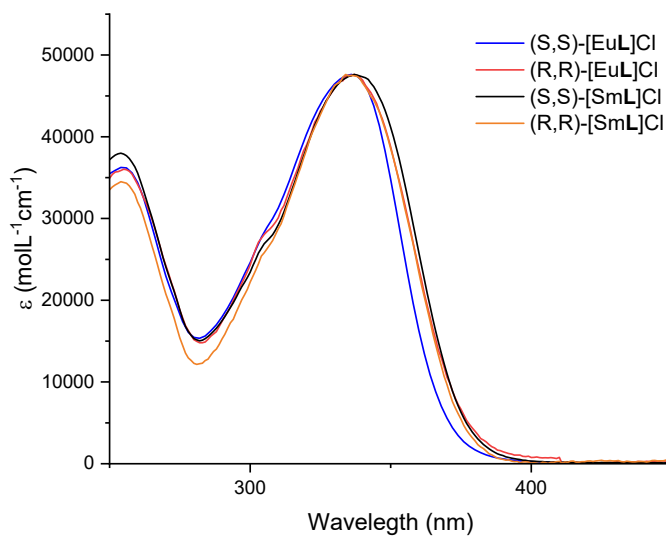

**Figure S18.** Electronic absorption of both the enantiomers of [EuL]Cl and [SmL]Cl in methanol solution at room temperature.

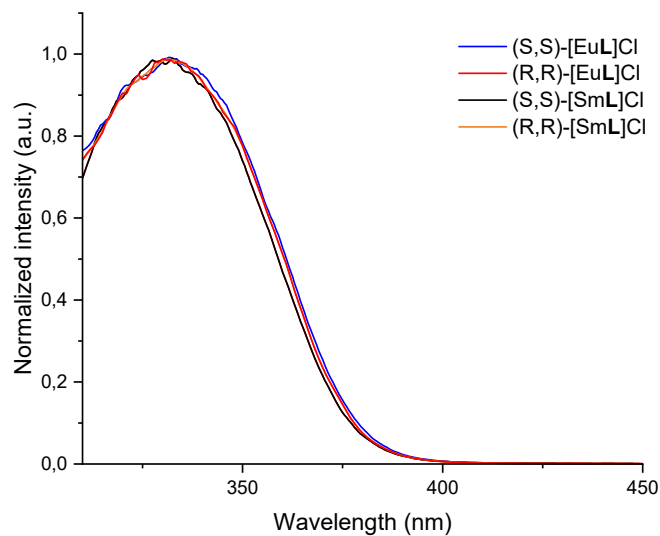

**Figure S19.** Normalized excitation spectra of both the enantiomers of [EuL]Cl and [SmL]Cl in water ( $10^{-6}$  M) at room temperature ( $\lambda_{em}$  614 nm and 645 nm, respectively).

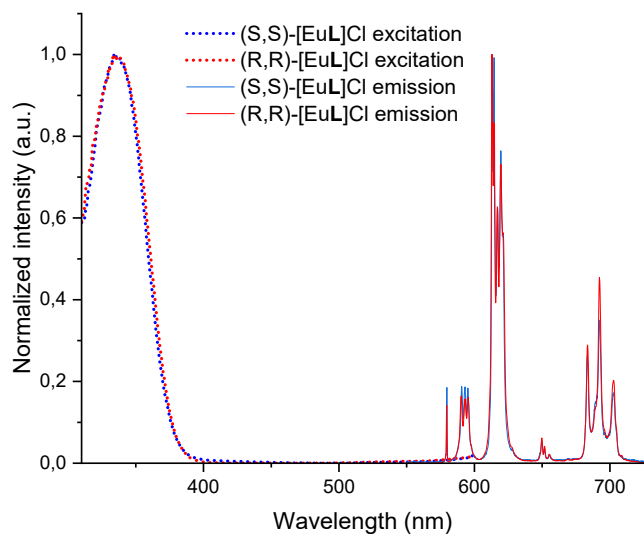

**Figure S20.** Normalized excitation and luminescence emission spectra of both the enantiomers of [EuL]Cl in methanol solution ( $10^{-6}$  M) at room temperature.  $\lambda_{exc}$  337 nm,  $\lambda_{em}$  614 nm.

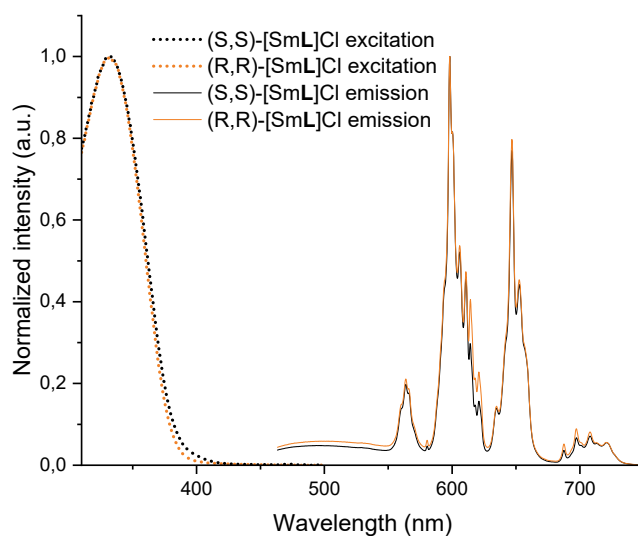

**Figure S21.** Normalized excitation and luminescence emission spectra of both the enantiomers of [SmL]Cl in methanol solution ( $10^{-6}$  M) at room temperature.  $\lambda_{\text{exc}}$  337 nm,  $\lambda_{\text{em}}$  645 nm.

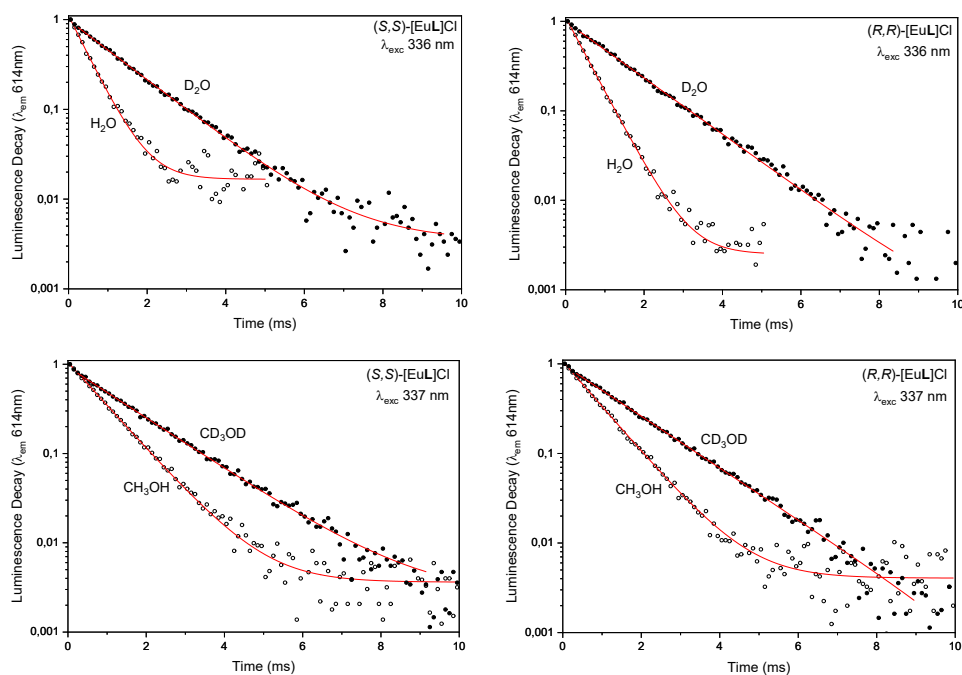

**Figure S22.** Luminescence decay curve of the emitting  $^5D_0$  level of Eu(III) for (*S,S*)-[EuL]Cl enantiomer dissolved in  $H_2O/D_2O$  (up left);  $CH_3OH/CD_3OD$  (bottom left) and for (*R,R*)-[EuL]Cl enantiomer dissolved in  $H_2O/D_2O$  (up right);  $CH_3OH/CD_3OD$  (bottom right). All the curves are collected at room temperature. For (*S,S*)-[EuL]Cl  $\tau_{H_2O} = 0.48(1)$  ms,  $\tau_{D_2O} = 1.30(1)$  ms;  $\tau_{CH_3OH} = 0.89(1)$  ms,  $\tau_{CD_3OD} = 1.52(1)$  ms. For (*R,R*)-[EuL]Cl  $\tau_{H_2O} = 0.52(1)$  ms,  $\tau_{D_2O} = 1.38(1)$  ms;  $\tau_{CH_3OH} = 0.86(1)$  ms,  $\tau_{CD_3OD} = 1.50(1)$  ms.

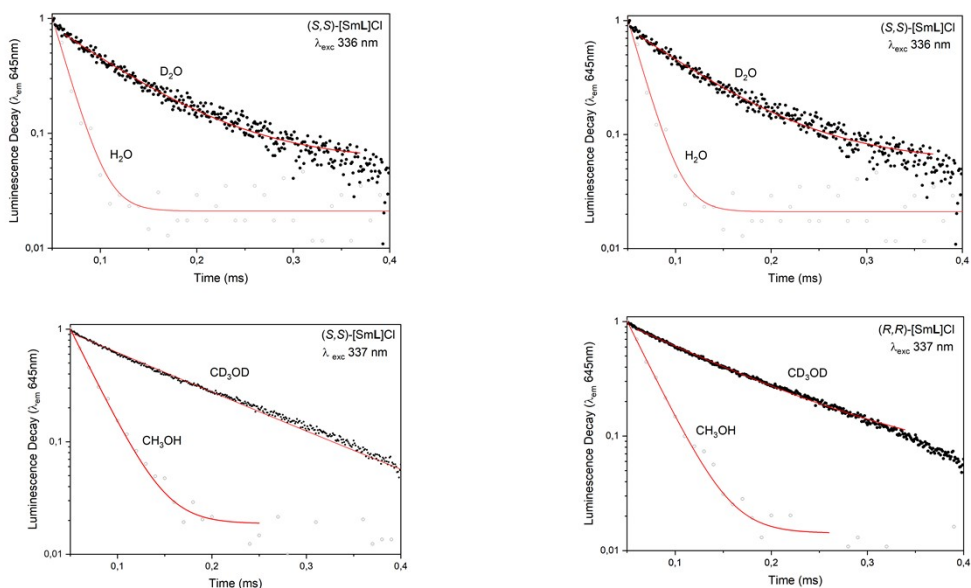

**Figure S23.** Luminescence decay curve of the emitting  $^4G_{5/2}$  level of Sm(III) for (*S,S*)-[SmL]Cl enantiomer dissolved in H<sub>2</sub>O/D<sub>2</sub>O (up left); CH<sub>3</sub>OH/CD<sub>3</sub>OD (bottom left) and for (*R,R*)-[SmL]Cl enantiomer dissolved in H<sub>2</sub>O/D<sub>2</sub>O (up right); CH<sub>3</sub>OH/CD<sub>3</sub>OD (bottom right). All the curves are collected at room temperature. For (*S,S*)-[SmL]Cl  $\tau_{H_2O} = 14.8(6) \mu s$ ,  $\tau_{D_2O} = 72.4(9) \mu s$ ;  $\tau_{CH_3OH} = 23.2(3) \mu s$ ,  $\tau_{CD_3OD} = 123.6(9) \mu s$ . For (*R,R*)-[SmL]Cl  $\tau_{H_2O} = 13.9(3) \mu s$ ,  $\tau_{D_2O} = 66.4(9) \mu s$ ;  $\tau_{CH_3OH} = 22.9(4) \mu s$ ,  $\tau_{CD_3OD} = 122.9(9) \mu s$ .

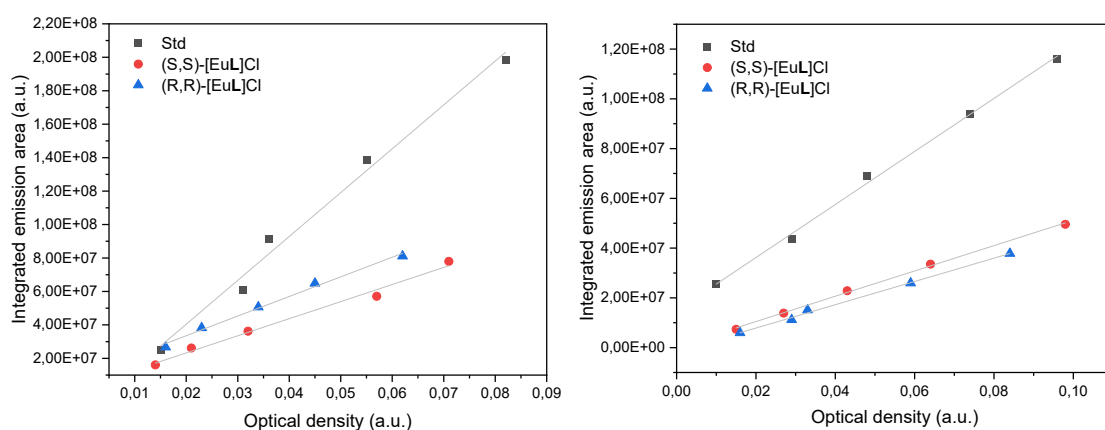

**Figure S24.** Linear relationship between the integrated emission area of Eu(III) and the optical density of the excitation source for both the enantiomers of [EuL]Cl complexes in methanol (left) and in water solution (right). The same relationship is reported for the reference quinine sulfate (Std; 1N aqueous solution of sulfuric acid).  $\lambda_{exc} 340 \text{ nm}$ .

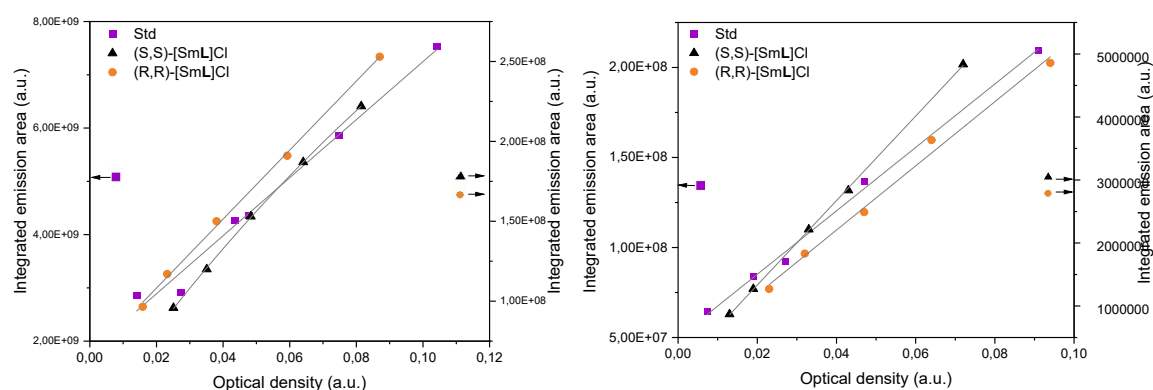

**Figure S25.** Linear relationship between the integrated emission area of Sm(III) and the optical density of the excitation source for both the enantiomers of [SmL]Cl complexes in methanol solution (left) and in aqueous solution (right). The same relationship is reported for the reference quinine sulfate (Std; 1N aqueous solution of sulfuric acid).  $\lambda_{\text{exc}}$  340 nm.

The photostability measurement was conducted with compound (S,S)-[EuL]Cl dissolved in methanol (optical density ca 0.15) and in a 10 mm quartz cuvette under continuous stirring in the fluorimeter. Calibration of the fluorimeter irradiation was measured with a ThorLab power-meter. The slits were fixed at 14 nm and we checked that detector saturation was avoided. In this condition, the incident power at 324 nm was measured at  $P_{\text{inc}} = 3.5$  mW.

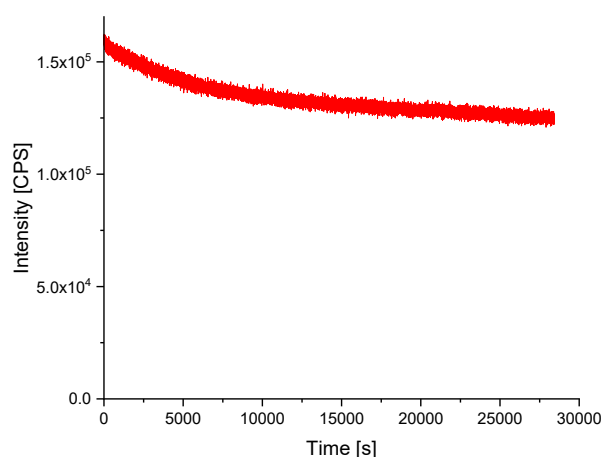

**Figure S26.** Variation of the emission intensity of (S,S)-[EuL]Cl in methanol (at 615 nm) under 324 nm irradiation ( $P_{\text{inc}} = 3.5$  mW).

## S4. CHIROPTIC MEASUREMENTS

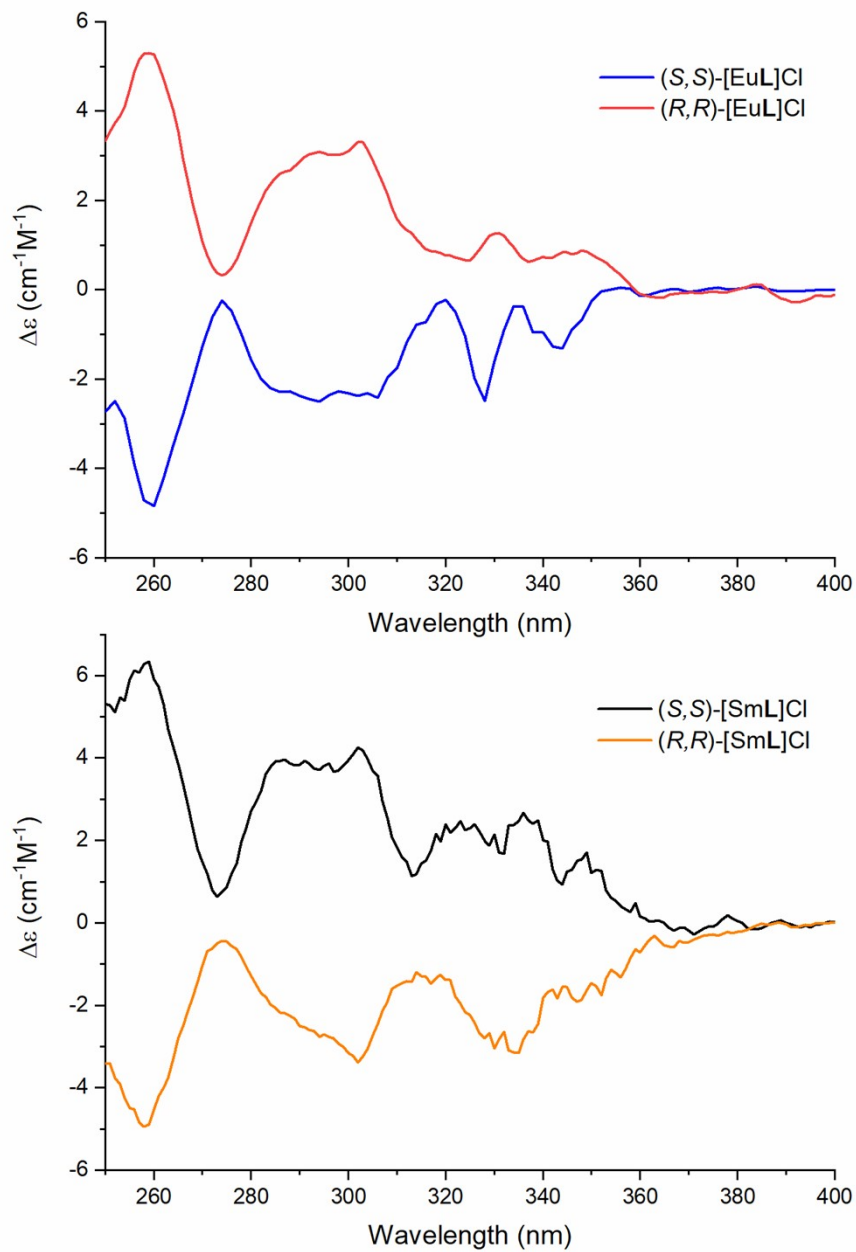

**Figure S27.** ECD spectra of both the enantiomers of the [EuL]Cl (up) and [SmL]Cl (bottom) complexes in methanol solution ( $10^{-6}$  M) at room temperature.

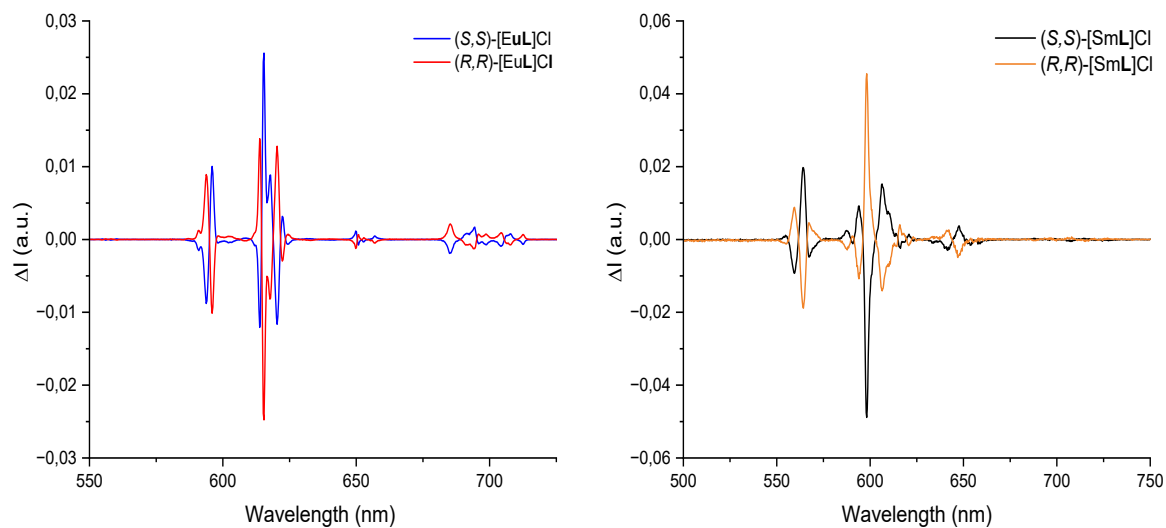

**Figure S28.** CPL spectra of both the enantiomers of the  $[\text{EuL}]\text{Cl}$  (left) and  $[\text{SmL}]\text{Cl}$  (right) complexes in methanol solution ( $10^{-4}$  M) at room temperature.

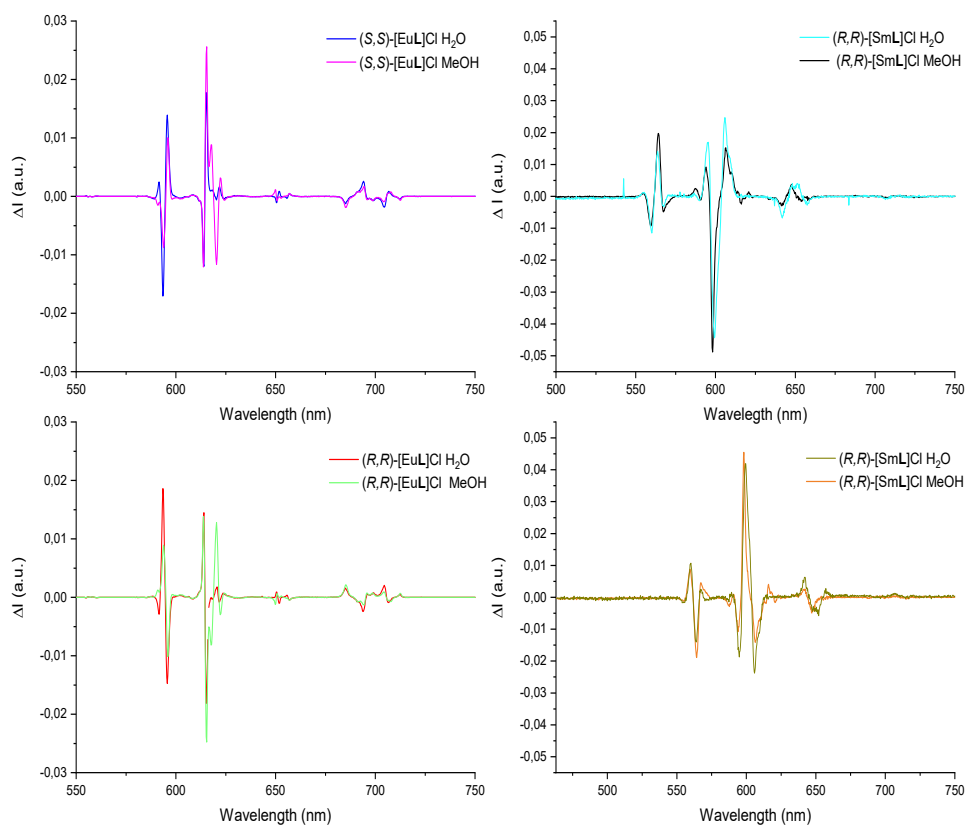

**Figure S29.** Overlap of CPL spectra in water and methanol ( $10^{-4}$  M) at room temperature of (S,S)-[EuL]Cl (up left), (R,R)-[EuL]Cl (bottom left), (S,S)-[SmL]Cl (up right), (R,R)-[SmL]Cl (bottom right) complexes.

## S5. TWO PHOTONS ABSORPTION

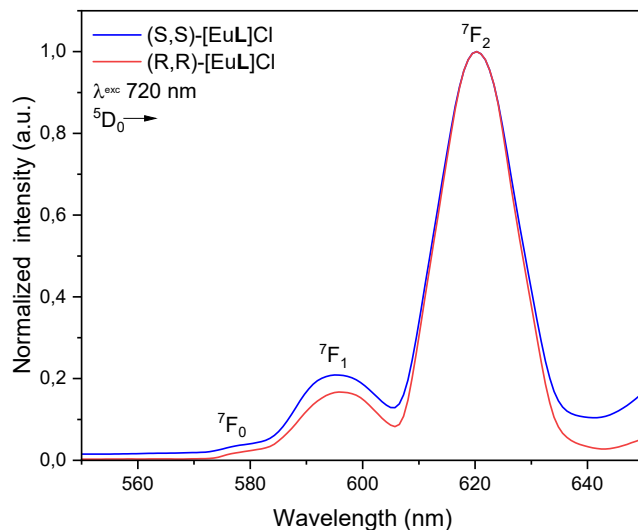

**Figure S30.** Luminescence spectra of both the enantiomers of [EuL]Cl in methanol solution ( $10^{-5}$  M) upon two-photon excitation in the NIR spectral region ( $\lambda_{exc}=720$  nm).



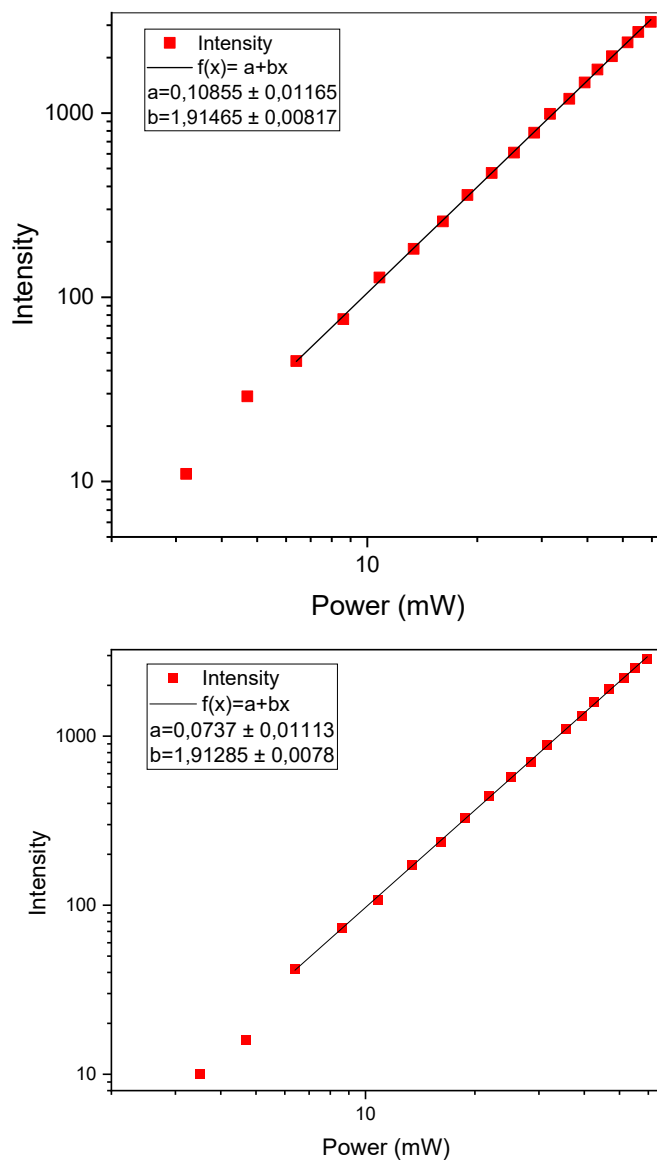

**Figure S31.** Variation of the luminescence intensity of Eu(III) with the laser excitation power ( $\lambda_{\text{ex}} = 720 \text{ nm}$ ) for (*S,S*)-[EuL]Cl (upper) and (*R,R*)-[EuL]Cl (bottom) both dissolved in methanol ( $10^{-5} \text{ M}$ ).

## S6. REFERENCES

- 1) H. E. Gottlieb and A. Nudelman, *J. Org. Chem.*, **1997**, 62, 21.
- 2) a) W. T. Carnall, P. R. Fields and K. Rajnak, *J. Chem. Phys.*, 1968, **49**, 4424; b) M. H. V. Werts and J. W. Verhoeven, *Phys. Chem. Chem. Phys.*, **2002**, 4, 1542–1548.
- 3) R. C. Holz and W. DeW. Horrocks, Jr., *Inorg. Chem.*, **1991**, 30, 3270–3275.
- 4) M. P. O. Wolbers and D. N. Reinhoud, *J. Chem. Soc., Perkin Trans.* **1998**, 2, 2141-2150.
